# Supplementary material for: Cryptococcus neoformans Prp8 Intein: An In Vivo Target-Based Drug Screening System in Saccharomyces cerevisiae to Identify Protein Splicing Inhibitors and Explore Its Dynamics
Source: MDPI journal article supplement (doi:10.3390/jof8080846), 2022-08-12
Supplement: s1 [file s1]

# ***Cryptococcus neoformans* Prp8 Intein: An In Vivo Target-Based Drug Screening System in *Saccharomyces cerevisiae* to Identify Protein Splicing Inhibitors and Explore Its Dynamics**

José Alex Lourenço Fernandes <sup>1,2,3,\*</sup>, Matheus da Silva Zatti <sup>1,2</sup>, Thales Domingos Arantes <sup>4</sup>, Maria Fernanda Bezerra de Souza <sup>2</sup>, Mariana Marchi Santoni <sup>5</sup>, Danuza Rossi <sup>6</sup>, Cleslei Fernando Zanelli <sup>5</sup>, Xiang-Qin Liu <sup>7</sup>, Eduardo Bagagli <sup>8</sup> and Raquel Cordeiro Theodoro <sup>1,\*</sup>

<sup>1</sup> Institute of Tropical Medicine, Federal University of Rio Grande do Norte (UFRN), Natal 59077-080, Rio Grande do Norte, Brazil

<sup>2</sup> Department of Biochemistry, Biosciences Center, Federal University of Rio Grande do Norte (UFRN), Natal 59078-900, Rio Grande do Norte, Brazil

<sup>3</sup> Ottawa Hospital Research Institute (OHRI), The University of Ottawa, Ottawa, ON K1H 8M5, Canada

<sup>4</sup> Department of Biosciences and Technology, Institute of Tropical Pathology and Public Health, Federal University of Goiás, Goiânia 74605-050, Goiás, Brazil

<sup>5</sup> School of Pharmaceutical Sciences, São Paulo State University (UNESP), Araraquara 14800-903, São Paulo, Brazil

<sup>6</sup> Pensabio, São Paulo 05005-010, São Paulo, Brazil

<sup>7</sup> Department of Biochemistry and Molecular Biology, Dalhousie University, Halifax, NS B3H 4R2, Canada

<sup>8</sup> Microbiology and Immunology Department, Biosciences Institute of Botucatu, São Paulo State University (UNESP), Botucatu 18618-689, São Paulo, Brazil

\* Correspondence: alfernandes@ohri.ca (J.A.L.F.); raquel.theodoro@ufrn.br (R.C.T.)

## **Supplementary Materials**

|                                                                                                           |           |
|-----------------------------------------------------------------------------------------------------------|-----------|
| <b>Figure S1 – 3D structure of the <i>S. cerevisiae</i> Ura3 dimer and CnePrp8i insertion site. ....</b>  | <b>2</b>  |
| <b>Table S1 – Primers used in this work .....</b>                                                         | <b>3</b>  |
| <b>Figure S2 – pRS313 Plasmid Map and Sequence .....</b>                                                  | <b>4</b>  |
| <b>Figure S3 – pRHis Plasmid Map and Sequence .....</b>                                                   | <b>7</b>  |
| <b>Figure S4 – pRExt Plasmid Map and Sequence .....</b>                                                   | <b>10</b> |
| <b>Figure S5 – pRInt Plasmid Map and Sequence.....</b>                                                    | <b>13</b> |
| <b>Figure S6 – pRMut Plasmid Map and Sequence .....</b>                                                   | <b>16</b> |
| <b>Figure S7 – Alignment of the Proteins generated by this work, highlighting its modifications .....</b> | <b>19</b> |
| <b>Figure S8 – Protein sequences generated by this work, highlighting its modifications.....</b>          | <b>20</b> |

**Figure S1** – 3D structure of the *S. cerevisiae* Ura3 dimer and CnePrp8i insertion site.

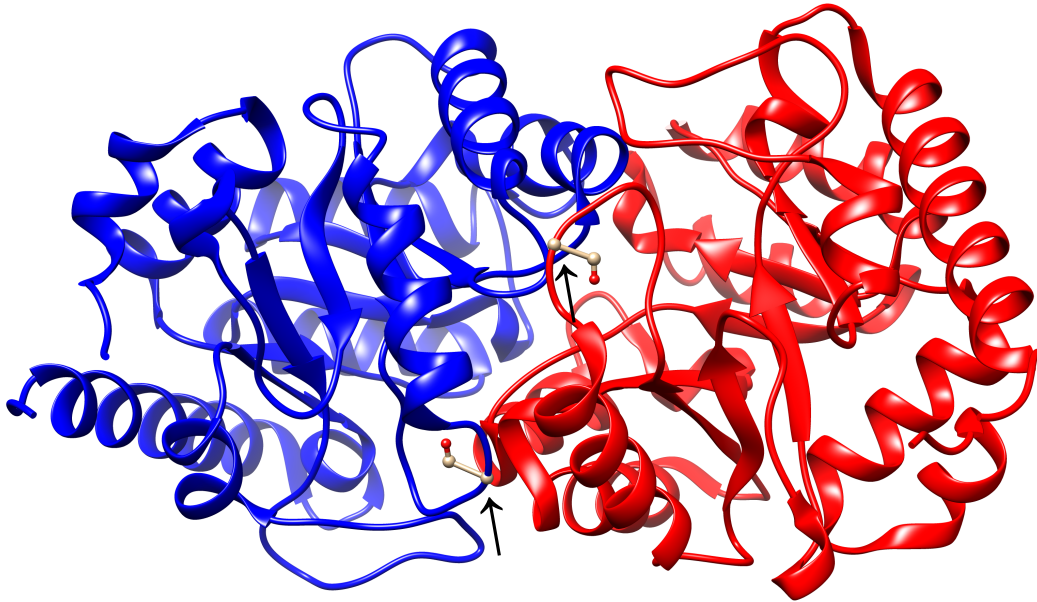

CnePrp8i insertion site (black arrows) and Serine 158 have been highlighted. Based on X-ray diffraction crystal structure from PDB 1DQX – Orotidine 5'-phosphate Decarboxylase complexed to 6-hydroxyuridine 5'-phosphate (BMP) at 2.40 Å resolution. For the purpose of this figure, BMP molecules have been removed.

**Table S1** – Primers used in this work

| #     | Primer Name       | Sequence 5' → 3'                 | Modification      | T <sub>a</sub> (°C) * | Use                                                                              |
|-------|-------------------|----------------------------------|-------------------|-----------------------|----------------------------------------------------------------------------------|
| Set 1 | M13F              | GTAAACGACGGCCAGT                 | -                 | 55                    | Insert cloning amplification using the plasmid backbone                          |
|       | M13R              | AACAGCTATGACCATG                 | -                 |                       |                                                                                  |
| Set 2 | pCnePrp8-Intein_F | TGTCTGCAGAATGGTACTCG             | -                 | 55                    | CnePRP8i amplification, used for RT-PCR                                          |
|       | pCnePrp8-Intein_R | CAATACCAAATAGTCATGACG            | -                 |                       |                                                                                  |
| Set 3 | P35               | CGCGGATCCGCTTTTCAATTCAATTCATC    | -                 | 59                    | Insert amplification using the URA3 promoter and URA3 terminal site              |
|       | P102              | CGCAAGCTTTTAGTTTTGCTGGCCGCATCTTC | -                 |                       |                                                                                  |
| Set 4 | p3s               | ATGTCGAAAGCTACATATAAGG           | -                 | 62                    | Insert amplification using the URA3 initial and terminal sites, used for RT-PCR. |
|       | p102s             | TTAGTTTTGCTGGCCGCATCTTC          | -                 |                       |                                                                                  |
| Set 5 | ppRCT2(C→A)_1F    | GCTCTGCAGAATGGTACTCG             | 5' phosphorylated | 65                    | pRInt whole plasmid amplification, used for site-directed mutagenesis            |
|       | ppRCT2(C→A)_1R    | GGCCTTGCATGACAATTCTG             | 5' phosphorylated |                       |                                                                                  |
| Set 6 | ppRCT2(N→A)_2F    | TCCGGCCTATCTACTGGAGA             | 5' phosphorylated | 65                    | pRInt whole plasmid amplification, used for site-directed mutagenesis            |
|       | ppRCT2(N→A)_2R    | AGCGTGCAATACCAAATAGTCA           | 5' phosphorylated |                       |                                                                                  |
| Set 7 | Mut1F             | AGAATTGTCATGCAAGGCCGC            | -                 | 57                    | Identification of site-directed mutagenesis, used the screen ligated plasmids    |
|       | Mut2R             | CCAGTAGATAGGCCGGAAGC             | -                 |                       |                                                                                  |

\* Annealing Temperature.

Figure S2 – pRS313 Plasmid Map and Sequence

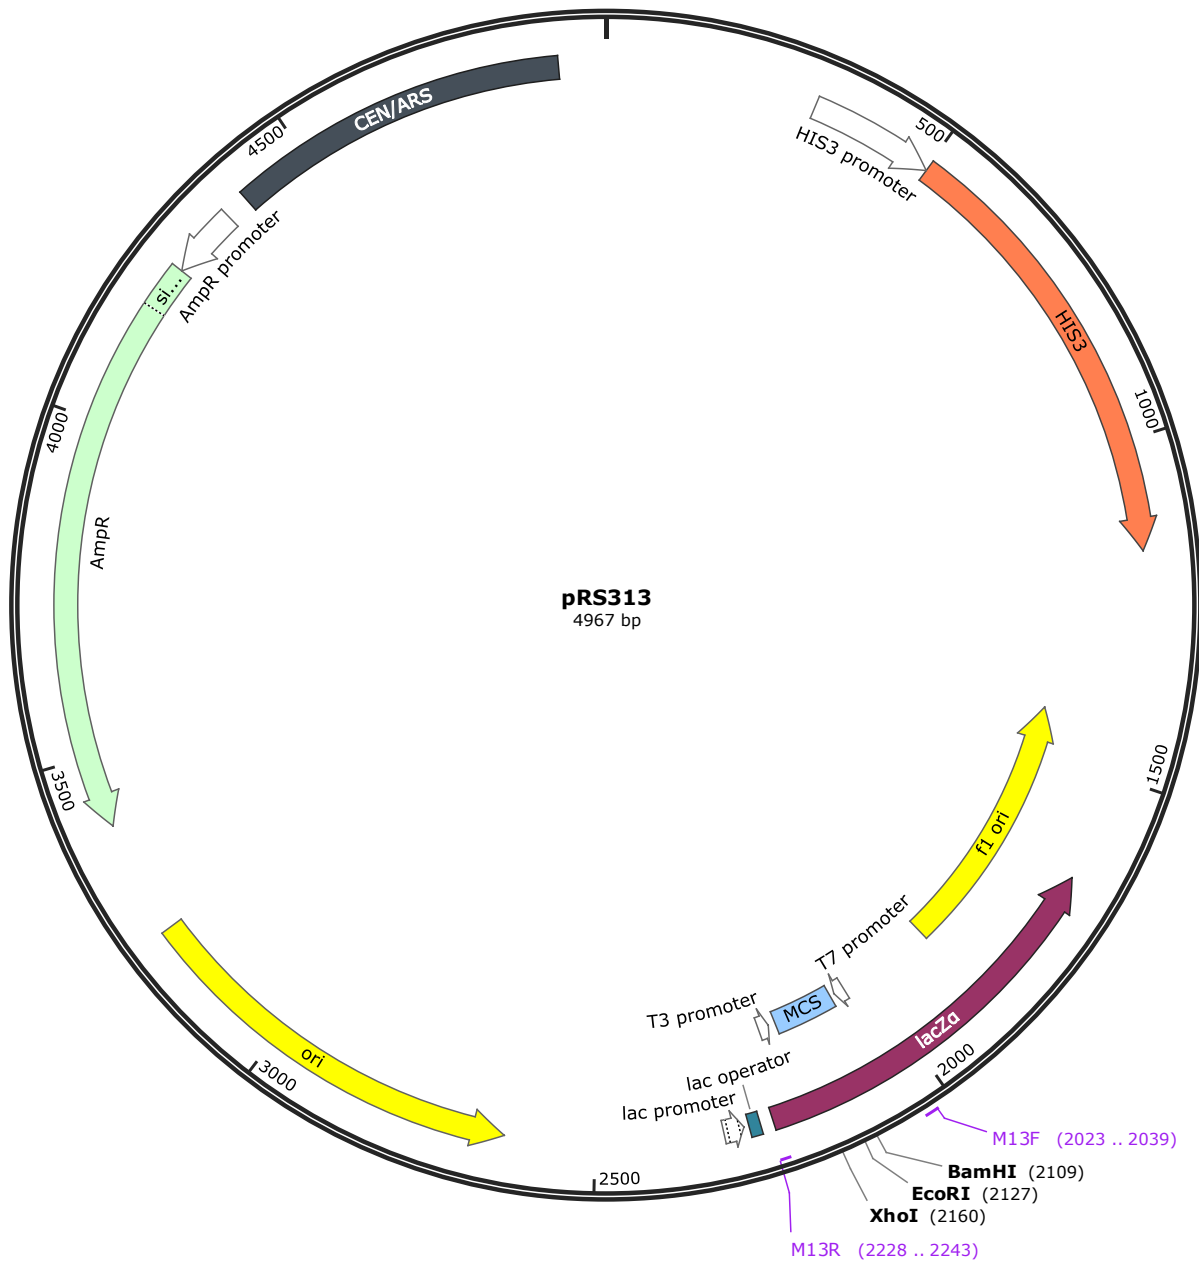

>pRS313 (4967 bp)

```
tgcgcggtttcgggtgatgacggtgaaaacctctgacacatgcagctcccggagacggtcacagc
ttgtctgtaagcggatgccgggagcagacaagcccgtcagggcgcgtcagcgggtggtggcggg
tgtcggggctggcttaactatgcggcacagagcagattgtactgagagtgcaccataattccg
ttttaagagcttggtgagcgttaggagtcactgccaggtatcgtttgaacacggcattagtcag
ggaagtcataacacagtcctttcccgaattttctttttctattactcttggcctcctctagta
cactctatatattttttatgcctcggtaatgattttcattttttttttccacctagcggatgac
tctttttttttcttagcgtattggcattatcacataatgaattatacattatataaagtaatgtg
atttcttcgaagaatataactaaaaaatgagcaggcaagataaacgaaggcaaagatgacagagc
agaaagccctagtaaagcgtattacaaatgaaaccaagattcagattgcatctctttaaagg
```

tgggtcccctagcgatagagcactcgatcttcccagaaaaagaggcagaagcagtagcagaacag  
gccacacaatcgcaagtgattaacgtccacacaggtatagggtttctggaccatatgatacatg  
ctctggccaagcattccggctggctcgctaatacggttgagtgcattgggtgacttacacatagacga  
ccatcacaccactgaagactgcgggattgctctcggtcaagcttttaagaggccctactggcg  
cgtggagtaaaaagggtttggatcaggatttgcgccctttggatgaggcactttccagagcgggtg  
tagatctttcgaacaggccgtacgcagttgtcgaacttggtttgcaaagggagaaaagtaggaga  
tctctcttgcgagatgatcccgcatcttcttgaaagctttgcagaggctagcagaattaccctc  
cacgttgattgtctgcgaggcaagaatgatcatcaccgtagtgagagtgcgttcaaggctcttg  
cggttgccataagagaagccacctcgcccaatggtaccaacgatgttccctccaccaagggtgt  
tcttatgtagtgacaccgattatttaaaagctgcagcatatatacatatggttatatatg  
tatacctatgaatgtcagtaagtatgtatacgaacagtatgatactgaagatgacaaggtaatg  
catcattctatacgtgtcattctgaacgaggcgcgctttccttttttctttttgctttttcttt  
ttttttctcttgaactcgacggatcatatgcgggtgtgaaataccgcacagatgcgtaaggagaa  
aataccgcatcaggaaattgtaaacgttaatatgtttaaatttcgcgttaaatttttgtaa  
atcagctcattttttaaccaataggccgaatcggaataatcccttataaatcaaaagaataga  
ccgagataggggttgagtgttgttccagtttgaacaagagtccactattaaagaacgtggactc  
caacgtcaaagggcgaaaaaccgtctatcagggcgatggccactacgtgaaccatcaccctaa  
tcaagttttttggggctcgaggtgccgtaaagcactaaatcggaaccctaaagggagccccgat  
ttagagcttgacggggaaagccggcgaaacgtggcgagaaaggaagggaagaaagcgaaaggagc  
ggcgctagggcgctggcaagtgtagcggtcacgctgcgcgtaaccaccacacccgcgcgctt  
aatgcgcgctacagggcgctgcgcgcattcgccattcagggtgcgcaactgttgggaagggc  
gatcgggtgcgggctcttcgctattacgccagctggcgaaaggggggatgtgctgcaaggcgatt  
aagttgggtaacgccagggttttccagtcacgacgttgtaaaacgacggccagtgaattgtaa  
tacgactcactatagggcgaaattggagctccaccgcggtggcgggcgctctagaactagtggat  
ccccgggctgcaggaattcgatatcaagcttatcgataccgctcgacctcgagggggggcccg  
taccagcttttgttcccttttagtgagggttaattccgagcttggcgtaatcatgggtcatagct  
gtttcctgtgtgaaattgttatccgctcacaattccacacaacataggagccggaagcataaag  
tgtaaagcctgggggtgcctaatagtgaggttaactcacattaattgcgttgcgctcactgcccg  
ctttccagtcgggaaacctgtcgtgccagctgcattaatgaatcggccaaacgcgcggggagagg  
cggtttgcgtattgggcgctcttccgcttctcgcctcactgactcgtgcgctcggtcgttcgg  
ctgcggcgagcgggtatcagctcactcaaaggcggttaatacggttatccacagaatcaggggata  
acgcaggaaagaacatgtgagcaaaaaggccagcaaaaaggccaggaaccgtaaaaaggccgcgtt  
gctggcggttttccataggctcgccccctgacgagcatcacaaaaatcgacgctcaagtacg  
aggtggcgaaaccgcagaggactataaagataaccaggcgttccccctggaagctccctcgtgc  
gctctcctgttccgaccctgccgcttaccggatacctgtccgcctttctcccttcgggaagcgt  
ggcgcttttctcaatgctcacgctgtaggtatctcagttcgggtgtaggtcgttcgctccaagctg  
ggctgtgtgcacgaaccccccgttcagcccagaccgctgcgccttatccggtaactatcgtcttg  
agtccaaccggtaagacacgacttatcgccactggcagcagccactggtaacaggattagcag  
agcgaggatgttaggcggtgctacagagttcttgaagtgggtggcctaactacggctacactaga  
aggacagtatttggtatctgcgctctgctgaagccagttaccttcggaaaaagagttggtagct  
cttgatccggcaaaaaccacccgctggtagcgggtggttttttgtttgcaagcagcagattac  
gcgcaaaaaaaaggatctcaagaagatcctttgatcttttctacggggtctgacgctcagtg  
aacgaaaactcacgttaagggttttggatcatgagattatcaaaaaggatcttcacctagatcc  
ttttaaatataaaatgaagttttaaatcaatctaaagtatatatgagtaaacttgggtctgacag  
ttaccaatgcttaatcagtgaggcacctatctcagcgatctgtctatcttcgttcatccatagtt  
gcctgactgcccgtcgtgtagataactacgatacgggagggcttaccatctggccccagtgctg  
caatgataccgcgagaccacgctcacccggtccagatttatcagcaataaaccagccagccgg

aagggccgagcgcagaagtggctcctgcaactttatccgcctccatccagtctattaattggtgc  
cgggaagctagagtaagtagttcgccagttaatagtttgcgcaacgttggtgccattgctacag  
gcatcgtggtgtcacgctcgtcgtttggtatggcttcattcagctccggttcccaacgatcaag  
gcgagttacatgatcccccattgttgtaaaaaaagcggttagctccttcgggtcctccgatcgtt  
gtcagaagtaagttggccgcagtggtatcactcatgggtatggcagcactgcataattctctta  
ctgtcatgccatccgtaagatgcttttctgtgactgggtgagtactcaaccaagtcatctgaga  
atagtgtatgcggcgaccgagttgctcttgccggcggtcaatacgggataataccgcgccacat  
agcagaactttaaaagtgtcatcattggaaaacgttcttcggggcgaaaactctcaaggatct  
taccgctggttgagatccagttcgatgtaaccctcgtgcacccaactgatcttcagcatcttt  
tactttcaccagcgtttctgggtgagcaaaaacaggaaggcaaaatgccgcaaaaaagggaata  
agggcgacacggaaatggtgaatactcatactcttcctttttcaatattattgaagcatttatc  
agggttattgtctcatgagcggatacatatttgaaatgtatttagaaaaataaacaatataggggt  
tccgcgcacatttccccgaaaagtgccacctgggtcctttttcatcacgtgctataaaaaataat  
ataattttaatttttttaataataatataaaattaaaaatagaaagtaaaaaaagaaattaaag  
aaaaaatagtttttggtttccgaagatgtaaaagactctagggggatcgccaacaatactacc  
ttttatcttgctcttcctgctctcaggtattaatgccgaattgtttcatcttgctgtgtagaa  
gaccacacacgaaaatcctgtgattttacattttacttatcgttaatcgaatgtatatctat  
aatctgcttttcttgcttaataatataatgtaaagtacgctttttggttgaaattttttaaac  
ctttgtttatttttttttcttcattccgtaactcttctaccttctttatttactttctaaaatc  
caaatacaaaacataaaaaataaataaacacagagtaaatcccaaattattccatcattaaaag  
atacgaggcgcggtgtaagttacaggcaagcgatccgtcctaagaaaccattattatcatgacat  
taacctataaaaaataggcgtatcacgaggccctttcgtc

Figure S3 – pRHis Plasmid Map and Sequence

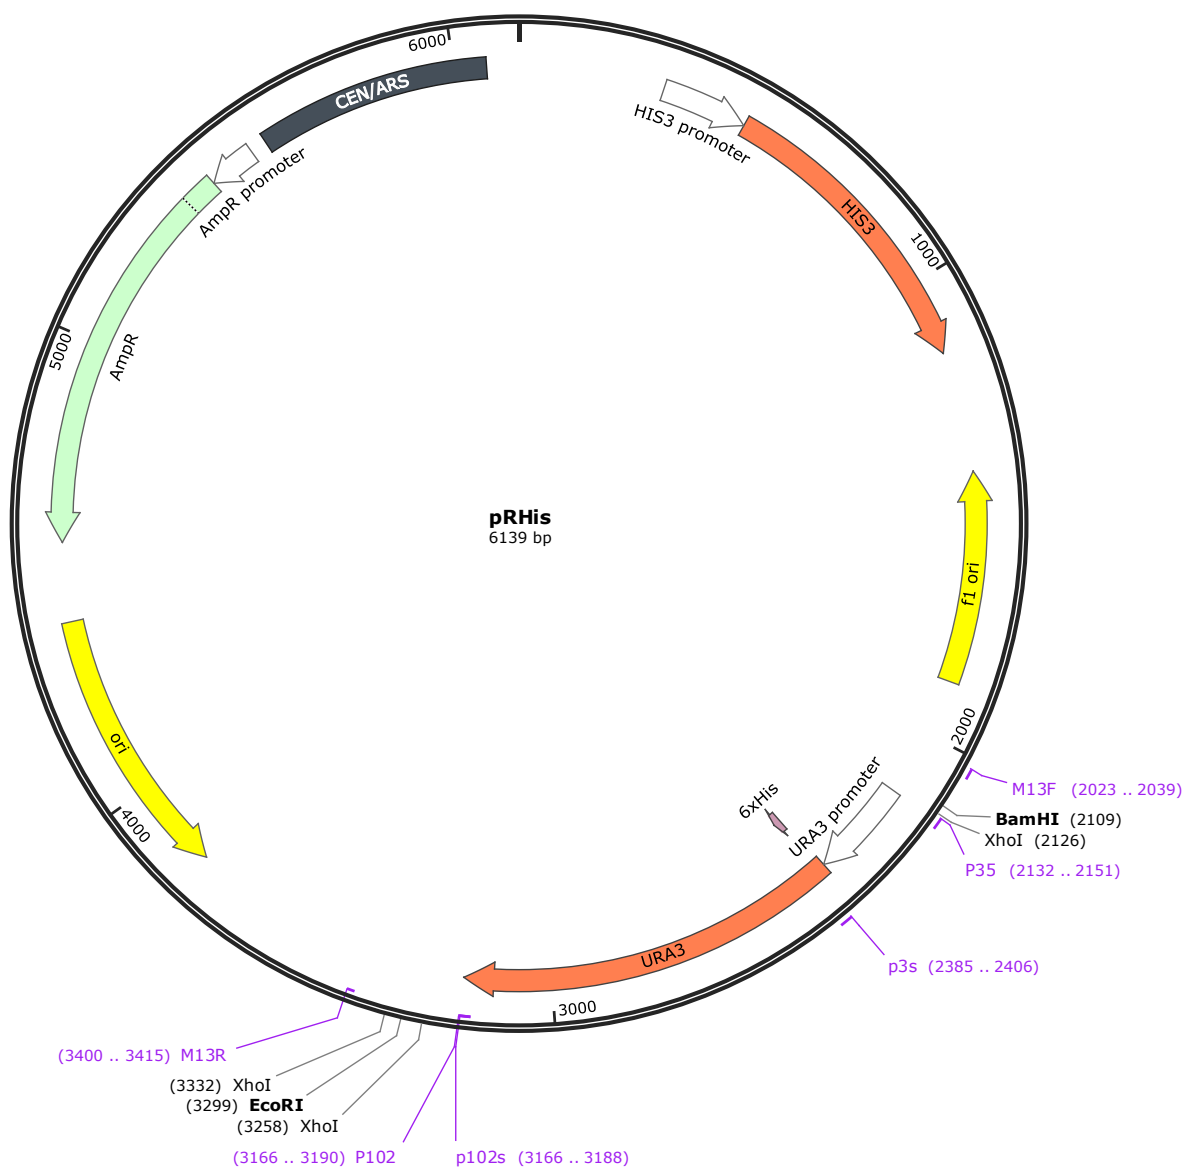

>pRHis (6139 bp)

```
tgcgcggttttcggtgatgacggtgaaaacctctgacacatgcagctcccggagacggtcacagc
ttgtctgtaagcggatgccgggagcagacaagcccgctcagggcgcgctcagcgggtgttggcggg
tgtcggggctggcttaactatgcggcatcagagcagattgtactgagagtgcaccataattccg
ttttaagagcttggtgagcgctaggagtcactgccaggtatcgtttgaacacggcattagtcag
ggaagtcataaacacagtcctttcccgcgaattttctttttctattactcttggcctcctctagta
cactctatattttttatgcctcggtaatgatttttcattttttttttccacctagcggatgac
tctttttttttcttagcgtattggcattatcacataatgaattatacattatataaagtaatgtg
atttcttcgaagaatataactaaaaaatgagcaggcaagataaacgaaggcaaagatgacagagc
```

agaaagccctagtaaagcgtattacaaatgaaaccaagattcagattgcgatctcttttaaaggg  
tgggtcccctagcgatagagcactcgatcttcccagaaaaagaggcagaagcagtagcagaacag  
gccacacaatcgcaagtgattaacgtccacacaggtatagggtttctggaccatatgatacatg  
ctctggccaagcattccgggtggtcgctaatacgttgagtgcattgggtgacttacacatagacga  
ccatcacaccactgaagactgcggtgattgctctcggtcaagcttttaaagagggccctactggcg  
cgtggagtaaaaagggtttggatcaggatttgcgccctttggatgaggcactttccagagcgggtg  
tagatctttcgaacaggccgtacgcagttgtcgaacttgggtttgcaaagggagaaagtaggaga  
tctctcttgcgagatgatcccgcatTTTTCTTGaaagctttgcagaggctagcagaattaccctc  
cacgttgattgtctgcgaggcaagaatgatcatcacctagtgagagtgcggttcaaggctcttg  
cggttgccataagagaagccacctcgcccaatggtaccaacgatgttccctccaccaaggtgt  
tcttatgtagtgacaccgattatttaaagctgcagcatatatacatatggtgtatatatg  
tatacctatgaatgtcagtaagtatgtatacgaacagtatgatactgaagatgacaaggtaatg  
catcattctatacgtgtcattctgaacgaggcgcgctttccttttttctttttgctttttcttt  
ttttttctcttgaactcgacggatcatatgcggtgtgaaataccgcacagatgcgtaaggagaa  
aataccgcatcaggaaattgtaaagcttaatatTTTgttaaaattcgcgtaaatttttgttaa  
atcagctcattttttaaccaataggccgaatcggcaaaatcccttataaatcaaaagaataga  
ccgagataggggttgagtgttgttccagtttggaaacaagagtcactattaaagaacgtggactc  
caacgtcaaagggcgaaaaaccgtctatcagggcgatggcccactacgtgaaccatcaccctaa  
tcaagtTTTTTggggtcgaggtgccgtaaagcactaaatcggaaccctaaaggagcccccgat  
ttagagcttgacggggaaagccggcgaaagctggcgagaaaggaagggaagaaagcgaaaggagc  
gggcgctagggcgctggcaagtgtagcggtcacgctgcgcgtaaccaccacacccgcgcgctt  
aatgcgcgctacagggcgctgcgcgcattcgccattcagggtgcgcaactgttgggaagggc  
gatcgggtgcgggctctctcgctattacgccagctggcgaaaggggggatgtgctgcaaggcgatt  
aagtgggtaacgccagggTTTTccagtcacgacgttgtaaaacgacggccagtgaattgtaa  
tacgactcactatagggcgaattggagctccaccgcggtggcgggcgctctagaactagtGAT  
CCGATGACCCAATCTCGAGGCTTTTCAATTCATTCATCTTTTTTTTTTTTGTCTTTTTTTTG  
ATTCGGTCTTCTTTGAAATTTTTTTGATTCGGTAATCTCCGAGCAGAAGGAAGAACGAAGGAAG  
GAGCACAGACTTAGATTGGTATATATACGCATATGTGGTGTGTAAGAAACATGAAATTGCCAG  
TATTCTTAACCCAACCTGCACAGAACAAAAACCTGCAGGAAACGAAGATAAATCATGGGATCACA  
CCACCACCACCACCATGTGAAAGCTACATATAAGGAACGTGCTGCTACTCATCCTAGTCCT  
GTTGCTGCCAAGCTATTTAATATCATGCACGAAAAGCAAACAACTTGTGTGCTTCATTGGATG  
TTCGTACCACCAAGGAATTACTGGAGTTAGTTGAAGCATTAGGTCCCAAAATTTGTTTACTAAA  
AACACATGTGGATATCTTGACTGATTTTTCCATGGAGGGCACAGTTAAGCCGCTAAAGGCATTA  
TCCGCCAAGTACAATTTTTTACTCTTCGAAGACAGAAAATTTGCTGACATTGGTAATACAGTCA  
AATTGCAGTACTCTGCGGGTGTATACAGAATAGCAGAATGGGCAGACATTACGAATGCACACGG  
TGTGGTGGGCCCAGGTATTGTTAGCGGTTTGAAGCAGGCGGCAGAAGAAGTAACAAAGGAACCT  
AGAGGCCTTTTGATGTTAGCAGAATTGTCATGCAAGGGCTCCCTATCTACTGGAGAATATACTA  
AGGGTACTGTTGACATTGCGAAGAGCGACAAAGATTTTGTTATCGGCTTTATTGCTCAAAGAGA  
CATGGGTGGAAGAGATGAAGGTTACGATTGGTTGATTATGACACCCGGTGTGGGTTTAGATGAC  
AAGGGAGACGCATTGGGTCAACAGTATAGAACCCTGGATGATGTGGTCTCTACAGGATCTGACA  
TTATTATTGTTGGAAGAGGACTATTTGCAAAGGGAAGGGATGCTAAGGTAGAGGGTGAACGTTA  
CAGAAAAGCAGGCTGGGAAGCATATTTGAGAAGATGCGGCCAGCAAACTAAAAAACTGTATTA  
TAAGTAAATGCATGTATACTAACTCACAAATTAGAGCTTCAATTTAATTATATCAGCTCGAGA  
TTGGATCTAGATGCATTCGCGAGGTACCGAGCTCGaattcgatatcaagcttatcgataccgtc  
gacctcgagggggggcccggtacccagcttttgttcccttttagtgagggttaattccgagcttg  
gcgtaatcatggtcatagctgtttcctgtgtgaaattgttatccgctcacaattccacacaaca  
taggagccggaagcataaagtgtaaagcctgggggtgcctaatagtgaggtaactcacattaat



tgcgttgcgctcactgcccgcgtttccagtcgggaaacctgtcgtgccagctgcattaatgaatc  
ggccaacgcgcggggagaggcggtttgcgatttgggcgctcttccgcttcctcgctcactgact  
cgctgcgctcggtcggttcggctgcggcgagcggtatcagctcactcaaaggcggtataacgggt  
atccacagaatcaggggataacgcaggaaagaacatgtgagcaaaaaggccagcaaaaaggccagg  
aacgtaaaaaaggccgcgttgctggcggtttttccataggctcggccccctgacgagcatcaca  
aaaatcgacgctcaagtcagaggtggcgaaacccgacaggactataaagataccaggcggttccc  
ccctggaagctccctcgctgcgctctcctgttccgaccctgccgcttacccggataacctgtccgcc  
tttctcccttcgggaagcggtggcgcttttctcaatgctcacgctgtaggtatctcagttcgggtg  
aggctggttcgctccaagctgggctgtgtgcacgaaccccccgttcagcccgaccgctgcgcctt  
atccggtaactatcgctcttgagccaacccggtaagacacgacttatcgccactggcagcagcc  
actggtaacaggattagcagagcgaggtatgtaggcgggtgctacagagttccttgaaagtgggtggc  
ctaactacggctacactagaaggacagtatgttggtatctgcgctctgctgaagccagttacctt  
cggaaaaagagttggtagctcttgatccggcaaaacaaaccaccgctggtagcggtgggtttttt  
gtttgcaagcagcagattacgcgcagaaaaaaaggatctcaagaagatcctttgatcttttcta  
cggggtctgacgctcagtggaacgaaaactcacgttaagggttttgggtcatgagattatcaaa  
aaggatcttcacctagatccttttaaatataaaatgaagttttaaatcaatctaaagtatatat  
gagtaaaacttggtctgacagttaccaatgcttaatcagtgaggcacctatctcagcgatctgtc  
tatttcgttcatccatagttgcctgactgcccgtcgtgtagataactacgatacgggagggcct  
accatctggccccagtgctgcaatgataccgcgagaccacgctcaccggctccagatttatca  
gcaataaaccagccagccggaaggccgagcgcagaagtggctcctgcaactttatccgcctcca  
tccagttctattaattggttgccgggaagctagagtaagtagttcgccagttaatagtttgcgcaa  
cgttggttgccattgctacaggcatcggtggtgtcacgctcgctcgtttggtatggcttcattcagc  
tccgggttcccaacgatcaaggcgagttacatgatcccccattgttgtaaaaaaagcggttagct  
ccttcggctcctccgatcggtgtcagaagtaagttggccgcagtggttatcactcatgggtatggc  
agcactgcataaattctcttactgtcatgccatccgtaagatgcttttctgtgactgggtgagtac  
tcaaccaagtcattctgagaatagtgtatgcggcgaccgagttgctccttgcccggcgtcaatac  
gggataataaccgcgccacatagcagaactttaaaagtgtcatcattggaaaacggttcttcggg  
gcaaaaactctcaaggatcttaccgctggttgagatccagttcgatgtaacccactcgtgcaccc  
aactgatcttcagcatcttttactttcaccagcggtttctgggtgagcaaaaacaggaaggcaaa  
atgccgcaaaaaagggaataaggcgacacggaaatggtgaatactcatactcttcctttttca  
atattattgaagcatttatcagggttattgtctcatgagcggatacatatttgaaatgtatttag  
aaaaataaacaataagggttccgcgcacatttccccgaaaagtgccacctgggtccttttcat  
cacgtgctataaaaaataattataattttaattttttaataataatataaaatataaaatagaa  
agtaaaaaaagaaattaaagaaaaaatagtttttggtttccgaagatgtaaaagactctagggg  
gatcgccaacaaataactaccttttatcttgctcttcctgctctcaggtattaatgccgaattgt  
ttcatcttgctgtgtgtagaagaccacacgaaaatcctgtgatttttacattttacttatcggt  
aatcgaatgtatatctattttaatctgcttttcttgcttaataaatatataatgtaaaagtacgctt  
tttggtgaaattttttaaacctttgtttatttttttttcttcattccgtaactcttctaccttc  
tttattttacttttctaaaatccaaatacaaaaacataaaaataaaataaacacagagtaaaattcca  
aattattccatcattaaaagatacgaggcgcggtgtaagttacaggcaagcgatccgtcctaaga  
aaccattattatcatgacattaacctataaaaaataggcgctatcacgaggccctttcgtc

Figure S4 – pRExt Plasmid Map and Sequence

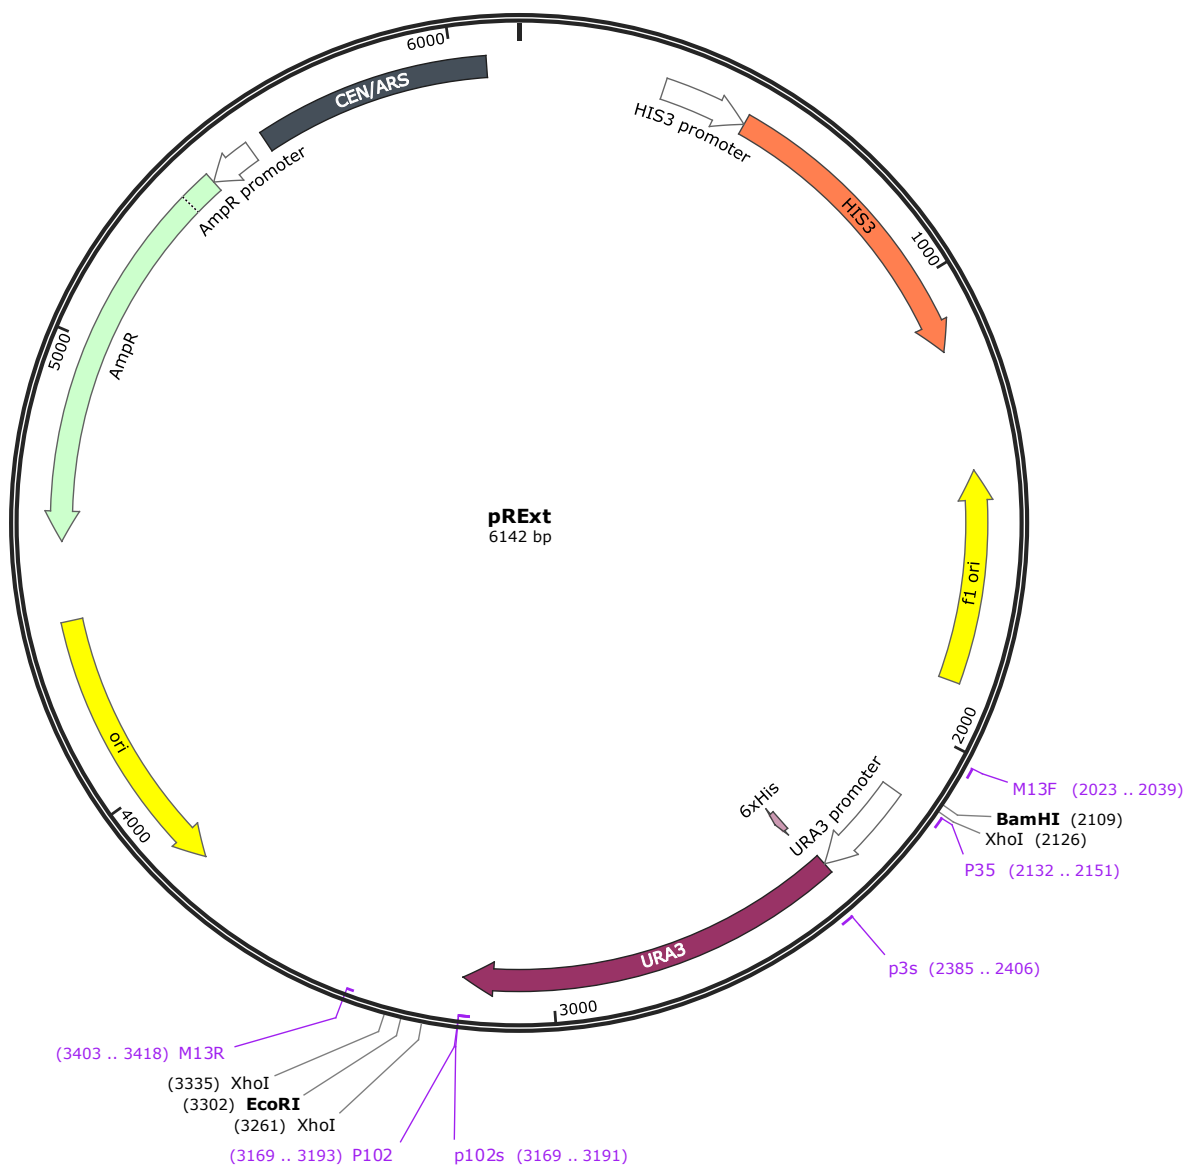

>pRExt (6142 bp)

```
tcgcgcggtttcggtgatgacggtgaaaacctctgacacatgcagctcccggagacggtcacagc
ttgtctgtaagcggatgccgggagcagacaagcccgtcagggcgcgctcagcgggtgttggcggg
tgtcggggctggcttaactatgcggcatcagagcagattgtactgagagtgcaccataattccg
ttttaagagcttggtgagcgctaggagtcactgccaggtatcgtttgaacacggcattagtcag
ggaagtcataacacagtcctttcccgaattttctttttctattactcttggcctcctctagta
cactctatatTTTTTTTatgcctcggtaatgattttcattttttttttccacctagcggatgac
tctttttttttcttagcgttggcattatcacataatgaattatacattatataaagtaatgtg
atttcttcgaagaatataactaaaaaatgagcaggcaagataaacgaaggcaaagatgacagagc
```

agaaagccctagtaaagcgtattacaaatgaaaccaagattcagattgcgatctcttttaaaggg  
tgggtcccctagcgatagagcactcgatcttcccagaaaaagaggcagaagcagtagcagaacag  
gccacacaatcgcaagtgattaacgtccacacaggtataggggttctggaccatatgatacatg  
ctctggccaagcattccgggtggtcgctaatacgttgagtgcattgggtgacttacacatagacga  
ccatcacaccactgaagactgcggtgattgctctcggtcaagcttttaaagaggccctactggcg  
cgtggagtaaaaagggtttggatcaggatttgcgccctttggatgaggcactttccagagcgggtg  
tagatctttcgaacaggccgtacgcagttgtcgaacttgggtttgcaaaggagaaagtaggaga  
tctctcttgcgagatgatcccgcatTTTTCTTGaaagctttgcagaggctagcagaattaccctc  
cacgttgattgtctgcgaggcaagaatgatcatcacctagtgagagtgcggttcaaggctcttg  
cggttgccataagagaagccacctcgcccaatggtaccaacgatgttccctccaccaagggtgt  
tcttatgtagtgacaccgattatttaaagctgcagcatatatacatatggtgtatatatg  
tatacctatgaatgtcagtaagtatgtatacgaacagtatgatactgaagatgacaaggtaatg  
catcattctatacgtgtcattctgaacgaggcgcgctttccttttttctttttgctttttcttt  
ttttttctcttgaactcgacggatcatatgcggtgtgaaataccgcacagatgcgtaaggagaa  
aataccgcatcaggaaattgtaaagcttaatatTTTgttaaaattcgcgtaaatttttgttaa  
atcagctcattttttaaccaataggccgaatcggcaaaatcccttataaatcaaaagaataga  
ccgagataggggttgagtgttgttccagtttggaaacaagagtcactattaaagaacgtggactc  
caacgtcaaaggcgcaaaaaccgtctatcaggcgatggcccactacgtgaaccatcacccata  
tcaagtTTTTTggggtcgagggtgccgtaaagcactaaatcggaaccctaaggaggagccccgat  
ttagagcttgacggggaaagccggcgaaagctggcgagaaaggaagggaagaaagcgaaaggagc  
gggcgctagggcgctggcaagtgtagcggtcacgctgcgcgtaaccaccacacccgcgcgctt  
aatgcgcgctacagggcgctgcgcgcattcgccattcaggctgcgcaactgttgggaagggc  
gatcgggtgcgggctctctcgctattacgccagctggcgaaaggggggatgtgctgcaaggcgatt  
aagtgggtaacgccagggttttccagtcacgacgttgtaaaacgacggccagtgaattgtaa  
tacgactcactatagggcgaattggagctccaccgcggtggcgggcgctctagaactagtGAT  
CCGATGACCCAATCTCGAGGCTTTTCAATTCATTCATCTTTTTTTTTTTTGTCTTTTTTTTG  
ATTCGGTCTTCTTTGAAATTTTTTTGATTCGGTAATCTCCGAGCAGAAGGAAGAACGAAGGAAG  
GAGCACAGACTTAGATTGGTATATATACGCATATGTGGTGTGAAGAAACATGAAATTGCCAG  
TATTCTTAACCCAACCTGCACAGAACAAAAACCTGCAGGAAACGAAGATAAATCATGGGATCACA  
CCACCACCACCACCATGTGAAAGCTACATATAAGGAACGTGCTGCTACTCATCTAGTCCT  
GTTGCTGCCAAGCTATTTAATATCATGCACGAAAAGCAAACAACTTGTGTGCTTCATTGGATG  
TTCGTACCACCAAGGAATTACTGGAGTTAGTTGAAGCATTAGGTCCCAAAATTTGTTTACTAAA  
AACACATGTGGATATCTTGACTGATTTTTCCATGGAGGGCACAGTTAAGCCGCTAAAGGCATTA  
TCCGCCAAGTACAATTTTTTACTCTTCGAAGACAGAAAATTTGCTGACATTGGTAATACAGTCA  
AATTGCAGTACTCTGCGGGTGTATACAGAATAGCAGAATGGGCAGACATTACGAATGCACACGG  
TGTGGTGGGCCCAGGTATTGTTAGCGGTTTGAAGCAGGCGGCAGAAGAAGTAACAAAGGAACCT  
AGAGGCCTTTTGATGTTAGCAGAATTGTCATGCAAGGCCTCCGGCCTATCTACTGGAGAATATA  
CTAAGGGTACTGTTGACATTGCGAAGAGCGACAAAGATTTTGTATCGGCTTTATTGCTCAAAG  
AGACATGGGTGGAAGAGATGAAGGTTACGATTGGTTGATTATGACACCCGGTGTGGGTTTAGAT  
GACAAGGGAGACGATTGGGTCAACAGTATAGAACCGTGGATGATGTGGTCTCTACAGGATCTG  
ACATTATTATTGTTGGAAGAGGACTATTTGCAAAGGGAAGGGATGCTAAGGTAGAGGGTGAACG  
TTACAGAAAAGCAGGCTGGGAAGCATATTTGAGAAGATGCGGCCAGCAAACTAAAAACTGTA  
TTATAAGTAAATGCATGTATACTAACTCACAATTAGAGCTTCAATTTAATTATATCAGCTCG  
AGATTGGATCTAGATGCATTCGCGAGGTACCGAGCTCGaattcgatatcaagcttatcgatacc  
gtcgacctcgagggggggggcccggtacccagcttttgttcccttttagtgaggggttaattccgagc  
ttggcgtaatcatggtcatagctgtttcctgtgtgaaattgttatccgctcacaattccacaca  
acataggagccggaagcataaagtgtaaagcctgggggtgcctaagtgagtgaggtaactcacatt

aattgcggttgcgctcactgccccgctttccagtcgggaaacctgtcgtgccagctgcattaatga  
atcgggccaacgcgcggggagagggcggtttgcgtattgggcgctcttccgcttcctcgctcactg  
actcgctgcgctcggtcggttcggctgcggcgagcggtatcagctcactcaaaggcggtaatacgc  
gttatccacagaatcaggggataacgcaggaaagaacatgtgagcaaaaaggccagcaaaaaggcc  
aggaaccgtaaaaaggccgcggttgctggcggtttttccataggctcggccccctgacgagcatc  
acaaaaatcgacgctcaagtcagaggtggcgaaacccgacaggactataaagataaccaggcggt  
ccccctggaagctccctcgctgcgctctcctgttccgacctgcccgttacccgatacctgtcc  
gcctttctcccttcgggaagcggtggcgctttctcaatgctcacgctgtaggtatctcagttcgg  
tgtaggtcgttcgctccaagctgggctgtgtgcacgaacccccggttcagcccgaaccgctgcgc  
cttatccggtaactatcgtcttgagtgcaacccggtaagacacgacttatcgccactggcagca  
gccactggtaacaggattagcagagcgaggtatgtaggcgggtgctacagagttcttgaagtgg  
ggcctaactacggctacactagaaggacagtatattgggtatctgcgctctgctgaagccagttac  
cttcggaaaaagagttggtagctcttgatccggcaaaacaaaccacgctggtagcggtgggtttt  
tttgtttgcaagcagcagattacgcgcagaaaaaaaggatctcaagaagatcctttgatctttt  
ctacggggcttgacgctcagtggaacgaaaactcacgttaagggattttgggtcatgagattatc  
aaaaaggatcttcacctagatccttttaattaaaaatgaagttttaaatcaatctaaagtata  
tatgagtaaacttggctgacagttaccaatgcttaatcagtgaggcacctatctcagcgatct  
gtctatttcgttcatccatagttgcctgactgcccgtcgtgtagataactacgatacgggaggg  
cttaccatctggccccagtgctgcaatgataccgcgagacccacgctcacccgctccagattta  
tcagcaataaaccagccagccggaagggccgagcgcagaagtggctcctgcaactttatccgcct  
ccatccagctctattaattgttgccgggaagctagagtaagttagttcgccagttaatagtttgcg  
caacgttgttgccattgctacaggcatcgtgggtgtcacgctcgtcgtttgggtatggccttcattc  
agctccggttcccaacgatcaaggcgagttacatgatcccccattgttgtaaaaaaagcgggtta  
gctccttcgggtcctccgatcggttgctcagaagtaagttggccgcagtggtatcactcatgggtat  
ggcagcactgcataattctcttactgtcatgccatccgtaagatgcttttctgtgactgggtgag  
tactcaaccaagtcattctgagaatagtgtatgcggcgaccgagttgctcttgcccggcgctcaa  
tacggggataataccgcgccacatagcagaactttaaaagtgtcatcattggaaaacggttcttc  
ggggcgaaaactctcaaggatcttaccgctggttgagatccagttcgatgtaacccactcgtgca  
cccaactgatcttcagcatcttttactttcaccagcgtttctgggtgagcaaaaaacaggaaggc  
aaaatgccgcaaaaaaggaataagggcgacacggaaatggtgaatactcatactcttcctttt  
tcaatattattgaagcatttatcaggggtattgtctcatgagcggatacatatttgaaatgtatt  
tagaaaaataaacaatataggggttccgcgcacatttccccgaaaagtgccacctgggtcctttt  
catcacgtgctataaaaaataattataatttaaatTTTTTaatataaaatatataaattaaaaata  
gaaagtaaaaaaagaaattaaagaaaaaatagtttttgttttccgaagatgtaaaagactctag  
ggggatcgccaacaataactaccttttatcttgctcttcctgctctcaggtattaatgccgaat  
tgtttcatcttgctgtgtgtagaagaccacacagaaaatcctgtgatttttacttttacttacc  
gttaatcgaatgtatatctatttaatctgcttttcttgcttaataaatatatatgtaaagtacg  
ctttttgttgaaatttttttaaacctttgtttatTTTTTTTcttcattccgtaactcttctacc  
ttcttttatttacttttctaaaaatccaaatacaaaacataaaaaataaataaacacagagtaaattc  
ccaaattattccatcattaaaagatacagaggcgcggtgtaagttacaggcaagcgatccgtccta  
agaaaccattattatcatgacattaacctataaaaaataggcggtatcacgaggcccttttcgtc

Figure S5 – pRInt Plasmid Map and Sequence

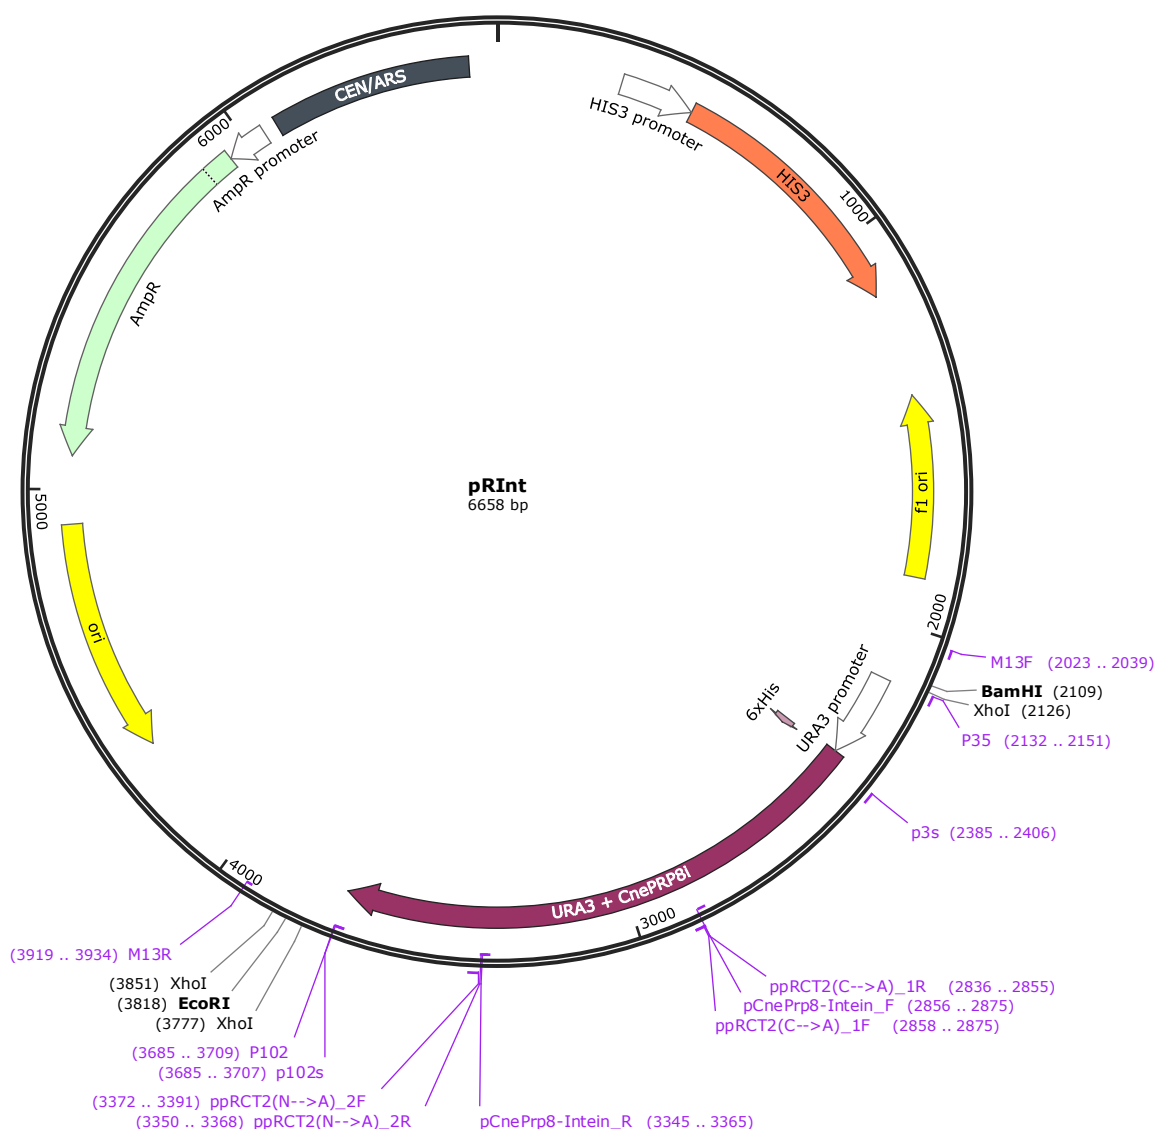

>pRInt (6658 bp)

```

tcgcgcggtttcggtgatgacggtgaaaacctctgacacatgcagctcccggagacggtcacagc
ttgtctgtaagcggatgccgggagcagacaagcccgctcagggcgcgtcagcgggtgttggcggg
tgtcggggctggcttaactatgcggcacatcagagcagattgtactgagagtgcaccataattccg
ttttaagagcttggtgagcgctaggagtcactgccaggtatcggttgaacacggcattagtcag
ggaagtcataacacagtcctttcccgcgaattttctttttctattactcttggcctcctctagta
cactctatatttttttatgcctcggtaatgattttcattttttttttccacctagcggatgac
tctttttttttcttagcgattggcattatcacataatgaattatacattatataaagtaatgtg
atttcttcgaagaatataactaaaaaatgagcagggaagataaacgaaggcaaagatgacagagc
agaaagccctagtaaagcgtattacaaatgaaaccaagattcagattgcgatctctttaaaggg
tgggtcccctagcgatagagcactcgatcttcccagaaaaagaggcagaagcagtagcagaacag
gccacacaatcgcaagtgattaacgtccacacaggtatagggtttctggaccatatgatacatg

```

ctctggccaagcattccggctggtcgctaatacggttgagtgcattgggtgacttacacatagacga  
ccatcacaccactgaagactgcgggattgctctcggtcaagcttttaagagggccctactggcg  
cgtggagtaaaaaggtttggatcaggatttgcgcctttggatgaggcactttccagagcgggtg  
tagatctttcgaacaggccgtacgcagttgtcgaacttggtttgcaaagggagaaagtaggaga  
tctctcttgcgagatgatcccgcatTTTTCTTGaaagctttgcagaggctagcagaattaccctc  
cacgttgattgtctgcgaggcaagaatgatcatcacccgtagtgagagtgcggttcaaggctcttg  
cggttgccataagagaagccacctcgcccaatggtaccaacgatgttccctccaccaaagggtgt  
tcttatgtagtgcacccgattatttaaagctgcagcatatgatatatacatgtgtatatatg  
tatacctatgaatgtcagtaagtatgtatacgaacagtatgatactgaagatgacaaggtaatg  
catcattctatacgtgtcattctgaacgaggcgcgctttccttttttcttttttcttttcttt  
ttttttctcttgaactcgacggatcatatgcggtgtgaaataccgcacagatgcgtaaggagaa  
aataccgcacaggaattgtaaacgttaatatTTTgttaaaattcgcgtaaatttttgttaa  
atcagctcattttttaaccaataggccgaaatcggcaaaatcccttataaatcaaaagaataga  
ccgagataggggttgagtgttgttccagtttggaaacaagagtccactattaaagaacgtggactc  
caacgtcaaagggcgaaaaaccgtctatcagggcgatggcccactacgtgaaccatcacctaa  
tcaagtTTTTTggggtcgaggtgccgtaaagcactaaatcggaaccctaaggaggagccccgat  
ttagagcttgacggggaaagccggcgaaacgtggcgagaaaggaagggaagaaagcgaaaggagc  
gggcgctagggcgctggcaagtgtagcggtcacgctgcgcgtaaccaccacacccgcgcgctt  
aatgcgcgctacagggcgcgctcgcgccattcgccattcaggctgcgcaactgttgggaagggc  
gatcgggtgcgggctcttcgctattacgccagctggcgaaaggggggatgtgctgcaaggcgatt  
aagttgggtaacgccagggttttcccagtcacgacgttgtaaaacgacggccagtgaattgtaa  
tacgactcactatagggcgaaattggagctccaccgcggtggcgggcgctctagaactagtGAT  
CCGATGACCCAATCTCGAGGCTTTTCAATTCAATTCATCTTTTTTTTTTTTGTCTTTTTTTTG  
ATTCGGTCTTCTTTGAAATTTTTTTGATTTCGGTAATCTCCGAGCAGAAGGAAGAACGAAGGAAG  
GAGCACAGACTTAGATTGGTATATATACGCATATGTGGTGTGAAGAAACATGAAATTGCCAG  
TATTCTTAACCCAACCTGCACAGAACAAAAACCTGCAGGAACGAAGATAAATCATGGGATCACA  
CCACCACCACCACCATGTGAAAGCTACATATAAGGAACGTGCTGCTACTCATCCTAGTCCT  
GTTGCTGCCAAGCTATTTAATATCATGCACGAAAAGCAAACAACTTGTGTGCTTCATTGGATG  
TTCGTACCACCAAGGAATTACTGGAGTTAGTTGAAGCATTAGGTCCCAAAATTTGTTTACTAAA  
AACACATGTGGATATCTTGACTGATTTTTCCATGGAGGGCACAGTTAAGCCGCTAAAGGCATTA  
TCCGCCAAGTACAATTTTTTACTCTTCGAAGACAGAAAATTTGCTGACATTGGTAATACAGTCA  
AATTGCAGTACTCTGCGGGTGTATACAGAATAGCAGAATGGGCAGACATTACGAATGCACACGG  
TGTGGTGGGCCCAGGTATTGTTAGCGGTTTGAAGCAGGCGGCAGAAGAAGTAACAAAGGAACCT  
AGAGGCCTTTTGATGTTAGCAGAATTGTCATGCAAGGCCTGTCTGCAGAATGGTACTCGTCTTC  
TCCGTGCCGATGGCTCTGAGGTCCTTGTGGAAGATGTTTCAGGAGGGCGATCAACTTCTTGGTCC  
CGATGGAACGAGCAGGACGGCGAGCAAGATTGTTTCGCGGCGAAGAGCGTCTCTACCGTATCAAA  
ACCCATGAGGGGCTCGAAGATCTTGTCTGTACCCATAACCACATCCTTTCTATGTATAAAGAAA  
GGTCTGGTTCGGAGCGAGCTCATTTCTCCTAGTCCCACCTCAGCCTCACAGACAGCCATGAGAG  
AGTCGATGTGACTGTGATGACTTTGTCCGCCTTCCTCAACAAGAGCAACAGAAGTATCAGCTT  
TTCCGTTCAACTGCTTCTGTGCGACACGAGCGACCATTCACTTCTAAATTAGACACCACCTTGT  
TACGCATCAATTCTATCGAGCTTGAGGACGAGCCTACGAAGTGGTCCGTTTTTGTGGTTGACAA  
AGACAGTCTTTATCTTCGTCATGACTATTTGGTATTGCACAACTCCGGCCTATCTACTGGAGAA  
TATACTAAGGGTACTGTTGACATTGCGAAGAGCGACAAAGATTTTGTTATCGGCTTTATTGCTC  
AAAGAGACATGGGTGGAAGAGATGAAGGTTACGATTGGTTGATTATGACACCCGGTGTGGGTTT  
AGATGACAAGGGAGACGCATTGGGTCAACAGTATAGAACCGTGATGATGTGGTCTCTACAGGA  
TCTGACATTATTATTGTTGGAAGAGGACTATTTGCAAAGGGGAAGGGATGCTAAGGTAGAGGGTG  
AACGTTACAGAAAAGCAGGCTGGGAAGCATATTTGAGAAGATGCGGCCAGCAAACTAAAAAAC

TGTATTATAAGTAAATGCATGTATACTAAACTCACAAATTAGAGCTTCAATTTAATTATATCAG  
CTCGAGATTGGATCTAGATGCATTCGCGAGGTACCGAGCTCGaattcgatatcaagcttatcga  
taccgtcgacctcgagggggggcccggtaccagcttttgttcccttttagtgaggggttaattcc  
gagcttggcgtaatcatggtcatagctgtttcctgtgtgaaattgttatccgctcacaattcca  
cacaacataggagccggaagcataaagtgtaaagcctggggtgcctaatagtgagtgaggtaactca  
cattaattgcggttgcgctcactgcccgtttccagtcgggaaacctgtcgtgccagctgcatta  
atgaatcggccaacgcgcggggagagggcggtttgctgtattgggcgctcttcgcttccctcgctc  
actgactcgctgcgctcggtcggtcggtgcggcgagcggtatcagctcactcaaaggcggtaa  
tacggttatccacagaatcaggggataacgcaggaaagaacatgtgagcaaaaggccagcaaaa  
ggccaggaaccgtaaaaaggccgcgttgctggcggtttttccataggctcgccccccctgacgag  
catcacaaaaatcgacgctcaagtcagaggtggcgaaacccgacaggactataaagataccagg  
cgttccccccctggaagctccctcgctgcgctctctctgttccgacctgcccgttacccgatacct  
gtccgccttttctcccttcgggaagcggtggcgcttttctcaatgctcacgctgtaggtatctcagt  
tcggtgtaggtcggtcgctccaagctgggctgtgtgcacgaaccccccggttcagccccgacctg  
gcgccttatccggtaactatcgctcttgagtcacaacccggttaagacacgacttatcgccactggc  
agcagccactggtaacaggatttagcagagcgaggtatgtaggcggtgctacagagttcttgaag  
tggtggcctaactacggctacactagaaggacagtatatttggtatctgcgctctgctgaagccag  
ttaccttcggaaaaagagttggtagctcttgatccggcaaaacaaaccaccgctggtagcggtgg  
tttttttgtttgcaagcagcagattacgcgcagaaaaaaaggatctcaagaagatcccttgatc  
ttttctacggggtctgacgctcagtggaacgaaaactcacgttaagggtttttggtcatgagat  
tatcaaaaaggatcttcacctagatcccttttaaatataaaatgaagttttaaatcaatctaaag  
tatatatgagtaaacttggtctgacagttaccaatgcttaatacagtgaggcacctatctcagcg  
atctgtctattttcggtcatccatagttgcctgactgcccgctcgtgtagataactacgatacggg  
agggttaccatctggccccagtgctgcaatgataccgcgagaccacgctcacccggtccaga  
tttatcagcaataaaccagccagccggaagggccgagcgcagaagtggctcctgcaactttatcc  
gcctccatccagctctattaattggttgccgggaagctagagtaagtagttcgccagttaatagtt  
tgcgcaacggttggtgccattgctacaggcatcgtgggtgtcacgctcgctcgttttggtatggcttc  
attcagctccggttcccaacgatcaaggcgagttacatgatcccccatgtttgtgaaaaaaagcg  
gttagctccttcggtcctccgatcgttgctcagaagtaagttggccgcagtggtatcactcatgg  
ttatggcagcactgcataattctcttactgtcatgccatccgtaagatgcttttctgtgactgg  
tgagtactcaaccaagtcattctgagaatagtgatgcggcgaccgagttgctcttgccggcg  
tcaatacgggataataaccgcgccacatagcagaactttaaaagtgtcatcattggaaaacggt  
cttcggggcgaaaactctcaaggatcttaccgctggtgagatccagttcgatgtaaccactcg  
tgcacccaactgatcttcagcatcttttactttcaccagcgtttctgggtgagcaaaaacagga  
aggcaaaatgccgcaaaaaagggaataaggggcgacacggaaatgttgaatactcatactcttcc  
tttttcaatattattgaagcatttatcagggttattgtctcatgagcggatacatatttgaatg  
tatttagaaaaataaacaataagggggtccgcgcacatttccccgaaaagtgccacctgggtcc  
ttttcatcacgtgctataaaaaataattataatttaaatTTTTTAATATAAATATAAATTA  
AATAGAAAGTAAAAAAGAAATTAAGAAAAAATAGTTTTTGTTTTCCGAAGATGTAAAAGACT  
CTAGGGGGATCGCCAACAATACTACCTTTTATCTTGCTCTTCTGCTCTCAGGTATTAATGCC  
GAATTGTTTCATCTTGCTGTGTAGAAGACCACACGAAAAATCCTGTGATTTTACATTTTACT  
TATCGTTAATCGAATGTATATCTATTTAATCTGCTTTTCTGTCTAATAAATATATATGTAAAG  
TACGCTTTTTGTGAAATTTTTTAACCTTTGTTTATTTTTTTTTCTTCATTCCGTAACCTCTC  
TACCTTCTTTATTTACTTTCTAAAATCCAAATACAAAACATAAAAAATAAATAAACACAGAGTAA  
ATTCCCAAATTATTCCATCATTAAAAGATACGAGGCGCGTGTAAGTTACAGGCAAGCGATCCGT  
CCTAAGAAACCATATTATCATGACATTAACCTATAAAAAATAGGCGTATCACGAGGCCCTTTCTC  
TC

Figure S6 – pRMut Plasmid Map and Sequence

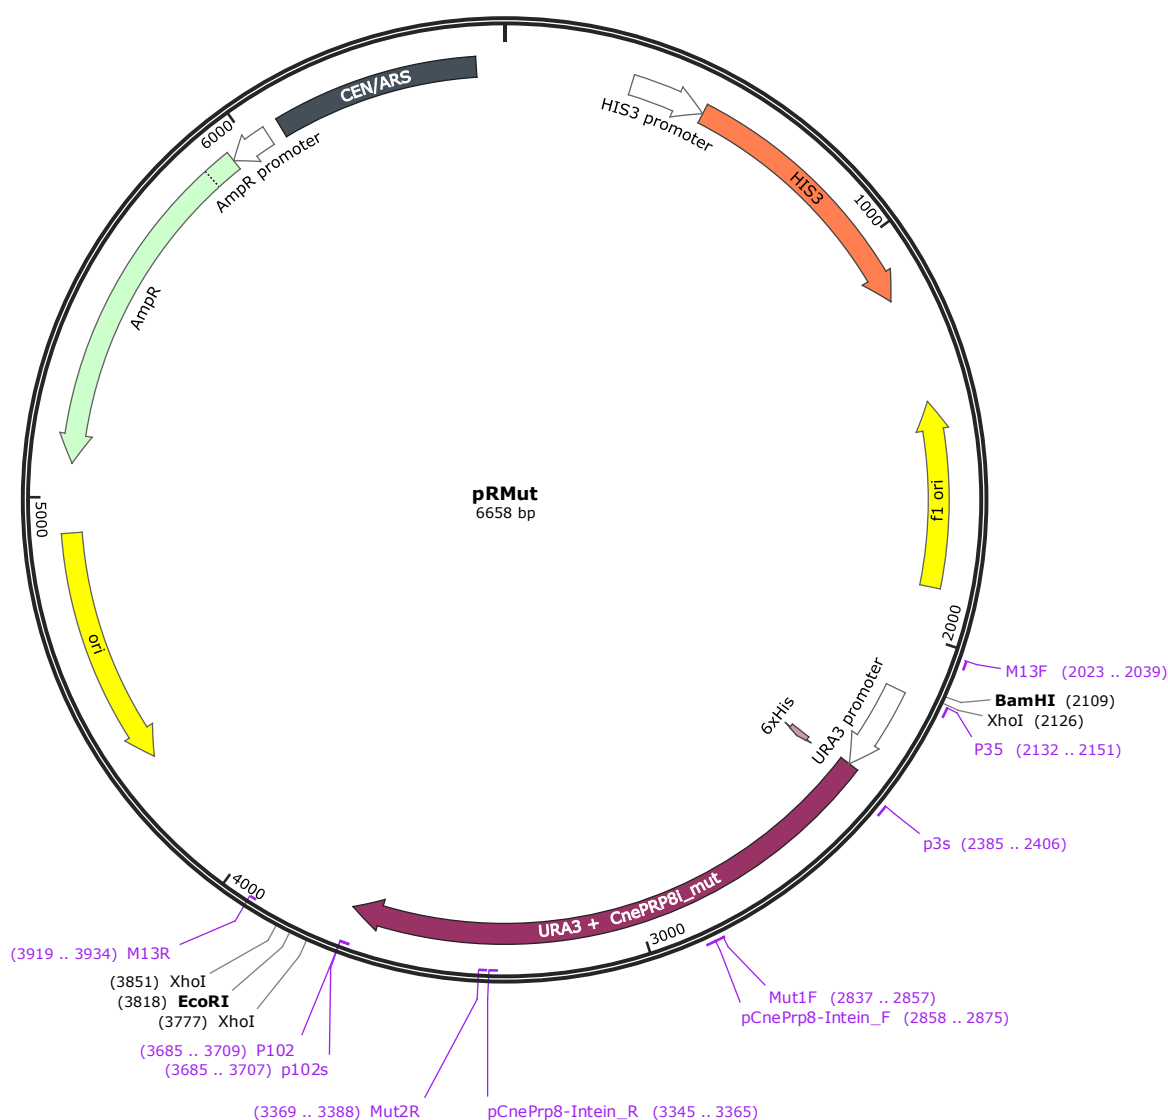

>pRMut (6658 bp)

```

tcgcgcggtttcggtgatgacggtgaaaacctctgacacatgcagctcccggagacggtcacagc
ttgtctgtaagcggatgccgggagcagacaagcccgtcagggcgcgtcagcgggtggtggcggg
tgtcggggctggcttaactatgcggcatcagagcagattgtactgagagtgcaccataattccg
ttttaagagcttggtgagcgctaggagtcactgccaggtatcgtttgaacacggcattagtcag
ggaagtcataacacagtcctttcccgaattttctttttctattactcttggcctcctctagta
cactctatatttttttatgcctcggtaatgattttcattttttttttccacctagcggatgac
tctttttttttcttagcgattggcattatcacataatgaattatacattatataaagtaatgtg
atttcttcgaagaatataactaaaaaatgagcaggcaagataaacgaaggcaaagatgacagagc
agaaagccctagtaaagcgtattacaaatgaaaccaagattcagattgcgatctctttaaaggg
tggtcccctagcgatagagcactcgatcttcccagaaaaagaggcagaagcagtagcagaacag
gccacacaatcgcaagtgattaacgtccacacaggtatagggtttctggaccatatgatacatg

```



ctctggccaagcattccggctggctcgctaatacggttgagtgcattgggtgacttacacatagacga  
ccatcacaccactgaagactgcgggattgctctcggtcaagcttttaagagggccctactggcg  
cgtggagtaaaaaggtttggatcaggatttgcgcctttggatgaggcactttccagagcgggtg  
tagatctttcgaacaggccgtacgcagttgtcgaacttggtttgcaaagggagaaagtaggaga  
tctctcttgcgagatgatcccgcatTTTTCTTGaaagctttgcagaggctagcagaattaccctc  
cacgttgattgtctgcgaggcaagaatgatcatcacccgtagtgagagtgcggttcaaggctcttg  
cggttgccataagagaagccacctcgcccaatggtaccaacgatgttccctccaccaaaagggtg  
tcttatgtagtgcacccgattatttaaagctgcagcatatgatatatacatgtgtatatatg  
tatacctatgaatgtcagtaagtatgtatacgaacagtatgatactgaagatgacaaggtaatg  
catcattctatacgtgtcattctgaacgaggcgcgctttccttttttcttttttcttttcttt  
ttttttctcttgaactcgacggatcatatgcggtgtgaaataccgcacagatgcgtaaggagaa  
aataccgcacaggaattgtaaacgttaatatTTTgttaaaattcgcgtaaatttttgttaa  
atcagctcattttttaaccaataggccgaaatcggcaaaatcccttataaatcaaaagaataga  
ccgagataggggttgagtgttgttccagtttggaaacaagagtccactattaaagaacgtggactc  
caacgtcaaagggcgaaaaaccgtctatcagggcgatggcccactacgtgaaccatcacctaa  
tcaagtTTTTTggggtcgaggtgccgtaaagcactaaatcggaaccctaaggaggagccccgat  
ttagagcttgacggggaaagccggcgaaacgtggcgagaaaggaagggaagaaagcgaaaggagc  
gggcgctagggcgctggcaagtgtagcggtcacgctgcgcgtaaccaccacacccgcgcgctt  
aatgcgcgctacagggcgcgctcgcgccattcgccattcaggctgcgcaactgttgggaagggc  
gatcgggtgcgggctcttcgctattacgccagctggcgaaaggggggatgtgctgcaaggcgatt  
aagttgggtaacgccagggttttcccagtcacgacgttgtaaaacgacggccagtgaaattgtaa  
tacgactcactatagggcgaaattggagctccaccgcggtggcgggcgctctagaactagtGAT  
CCGATGACCCAATCTCGAGGCTTTTCAATTCAATTCATCTTTTTTTTTTTTGTCTTTTTTTTG  
ATTCGGTCTTCTTTGAAATTTTTTTTGATTTCGGTAATCTCCGAGCAGAAGGAAGAACGAAGGAAG  
GAGCACAGACTTAGATTGGTATATATACGCATATGTGGTGTGTAAGAAACATGAAATTGCCAG  
TATTCTTAACCCAACCTGCACAGAACAAAAACCTGCAGGAACGAAGATAAATCATGGGATCACA  
CCACCACCACCACCATGTGAAAGCTACATATAAGGAACGTGCTGCTACTCATCCTAGTCCT  
GTTGCTGCCAAGCTATTTAATATCATGCACGAAAAGCAAACAACTTGTGTGCTTCATTGGATG  
TTCGTACCACCAAGGAATTACTGGAGTTAGTTGAAGCATTAGGTCCCAAAATTTGTTTACTAAA  
AACACATGTGGATATCTTGACTGATTTTTCCATGGAGGGCACAGTTAAGCCGCTAAAGGCATTA  
TCCGCCAAGTACAATTTTTTACTCTTCGAAGACAGAAAATTTGCTGACATTGGTAATACAGTCA  
AATTGCAGTACTCTGCGGGTGTATACAGAATAGCAGAATGGGCAGACATTACGAATGCACACGG  
TGTGGTGGGCCCAGGTATTGTTAGCGGTTTGAAGCAGGCGGCAGAAGAAGTAACAAAGGAACCT  
AGAGGCCTTTTGATGTTAGCAGAATTGTCATGCAAGGCCGCTCTGCAGAATGGTACTCGTCTTC  
TCCGTGCCGATGGCTCTGAGGTCCTTGTGGAAGATGTTTCAGGAGGGCGATCAACTTCTTGGTCC  
CGATGGAACGAGCAGGACGGCGAGCAAGATTGTTTCGCGGCGAAGAGCGTCTCTACCGTATCAAA  
ACCCATGAGGGGCTCGAAGATCTTGTCTGTACCCATAACCACATCCTTTCTATGTATAAAGAAA  
GGTCTGGTTCGGAGCGAGCTCATTTCTCCTAGTCCCACCTCAGCCTCACAGACAGCCATGAGAG  
AGTCGATGTGACTGTGATGACTTTGTCCGCCTTCCTCAACAAGAGCAACAGAAGTATCAGCTT  
TTCCGTTCAACTGCTTCTGTGCGACACGAGCGACCATTCACTTCTAAATTAGACACCACCTTGT  
TACGCATCAATTCTATCGAGCTTGAGGACGAGCCTACGAAGTGGTCCGTTTTTGTGGTTGACAA  
AGACAGTCTTTATCTTCGTCATGACTATTTGGTATTGCACGCTTCCGGCCTATCTACTGGAGAA  
TATACTAAGGGTACTGTTGACATTGCGAAGAGCGACAAAGATTTTGTTATCGGCTTTATTGCTC  
AAAGAGACATGGGTGGAAGAGATGAAGGTTACGATTGGTTGATTATGACACCCGGTGTGGGTTT  
AGATGACAAGGGAGACGCATTGGGTCAACAGTATAGAACCGTGGATGATGTGGTCTCTACAGGA  
TCTGACATTATTATTGTTGGAAGAGGACTATTTGCAAAGGGAAGGGATGCTAAGGTAGAGGGTG  
AACGTTACAGAAAAGCAGGCTGGGAAGCATATTTGAGAAGATGCGGCCAGCAAACTAAAAAAC

TGTATTATAAGTAAATGCATGTATACTAAACTCACAAATTAGAGCTTCAATTTAATTATATCAG  
CTCGAGATTGGATCTAGATGCATTCGCGAGGTACCGAGCTCGaattcgatatcaagcttatcga  
taccgtcgacctcgagggggggcccggtaccagcttttgttcccttttagtgaggggttaattcc  
gagcttggcgtaatcatggtcatagctgtttcctgtgtgaaattgttatccgctcacaattcca  
cacaacataggagccggaagcataaagtgtaaagcctggggtgcctaattgagtgaggtaactca  
cattaattgcggttgcgctcactgcccgtttccagtcgggaaacctgtcgtgccagctgcatta  
atgaatcggccaacgcgcggggagagggcggtttgctgtattgggcgctcttccgcttccctcgctc  
actgactcgctgcgctcggtcggtcggctgcggcgagcggtatcagctcactcaaaggcggtaa  
tacggttatccacagaatcaggggataacgcaggaaagaacatgtgagcaaaaggccagcaaaa  
ggccaggaaccgtaaaaaggccgcgttgctggcggtttttccataggctcgccccccctgacgag  
catcacaaaaatcgacgctcaagtcagaggtggcgaaacccgacaggactataaagataccagg  
cgttcccccttggaagctccctcgctgcgctctcctgttccgacctgccgcttacggataacct  
gtccgcctttctcccttcgggaagcggtggcgctttctcaatgctcacgctgtaggtatctcagt  
tcggtgtaggtcggtcgtccaagctgggctgtgtgcacgaaccccccggttcagccccgacctg  
gcgccttatccggtaactatcgctcttgagtcacaacccggttaagacacgacttatcgccactggc  
agcagccactggtaacaggatttagcagagcgaggtatgtaggcggtgctacagagttcttgaag  
tggtggcctaactacggctacactagaaggacagtatattgggtatctgcgctctgctgaagccag  
ttaccttcggaaaaagagttggtagctcttgatccggcaaaacaaaccaccgctggtagcggtgg  
tttttttgtttgcaagcagcagattacgcgcagaaaaaaaggatctcaagaagatcccttgatc  
ttttctacggggtctgacgctcagtggaacgaaaactcacgttaagggtttttgggtcatgagat  
tatcaaaaaggatcttcacctagatcccttttaaatataaaatgaagttttaaatcaatctaaag  
tatatatgagtaaacttggtctgacagttaccaatgcttaatcagtgaggcacctatctcagcg  
atctgtctatttcgttcatccatagttgcctgactgcccgctcgtgtagataactacgatacggg  
agggttaccatctggccccagtgctgcaatgataccgcgagaccacgctcacgggtccaga  
tttatcagcaataaaccagccagccggaagggccgagcgcagaagtggctcctgcaactttatcc  
gcctccatccagctctattaattgttgccgggaagctagagtaagtagttcgccagttaatagtt  
tgcgcaacggttggtgccattgctacaggcatcgtgggtgtcacgctcgtcgttttggtatggcttc  
attcagctccggttcccaacgatcaaggcgagttacatgatcccccatgtttgtgaaaaaaagcg  
gttagctccttcgggtcctccgatcgttgctcagaagtaagttggccgcagtggtatcactcatgg  
ttatggcagcactgcataattctcttactgtcatgccatccgtaagatgcttttctgtgactgg  
tgagtactcaaccaagtcattctgagaatagtgatgcggcgaccgagttgctcttgccggcg  
tcaatacgggataataaccgcgccacatagcagaactttaaaagtgtcatcattggaaaacggt  
cttcggggcgaaaactctcaaggatcttaccgctggtgagatccagttcgatgtaacccactcg  
tgcacccaactgatcttcagcatcttttactttcaccagcgtttctgggtgagcaaaaacagga  
aggcaaaatgccgcaaaaaagggaataaggggcgacacggaaatgttgaatactcatactcttcc  
tttttcaatattattgaagcatttatcagggttattgtctcatgagcggatacatatttgaatg  
tatttagaaaaataaacaataagggggtccgcgcacatttccccgaaaagtgccacctgggtcc  
ttttcatcacgtgctataaaaaataattataatttaaatTTTTTaatataaatataaattaaa  
aatagaaagtaaaaaaagaaattaaagaaaaaatagtttttgttttccgaagatgtaaaagact  
ctaggggggatcgccaacaaataactaccttttatcttgctcttccctgctctcaggtattaatgcc  
gaattgtttcatcttgtctgtgtagaagaccacacacgaaaatcctgtgattttacattttact  
tatcgttaatcgaaatgtatatctatttaactctgttttcttgcttaataaatatataatgtaaag  
tacgcttttttgttgaaatttttttaaacctttgtttatttttttttcttcattccgtaactcttc  
taccttctttattttactttctaaaatccaaatacaaaaacataaaaaataaataaacacagagtaa  
attcccaaatttattccatcattaaaagatacagaggcgctgtaagttacagggaagcgatccgt  
cctaagaaaccattattatcatgacattaacctataaaaaataggcggtatcacgaggccctttcg  
tc

**Figure S7** – Alignment of the Proteins generated by this work, highlighting its modifications

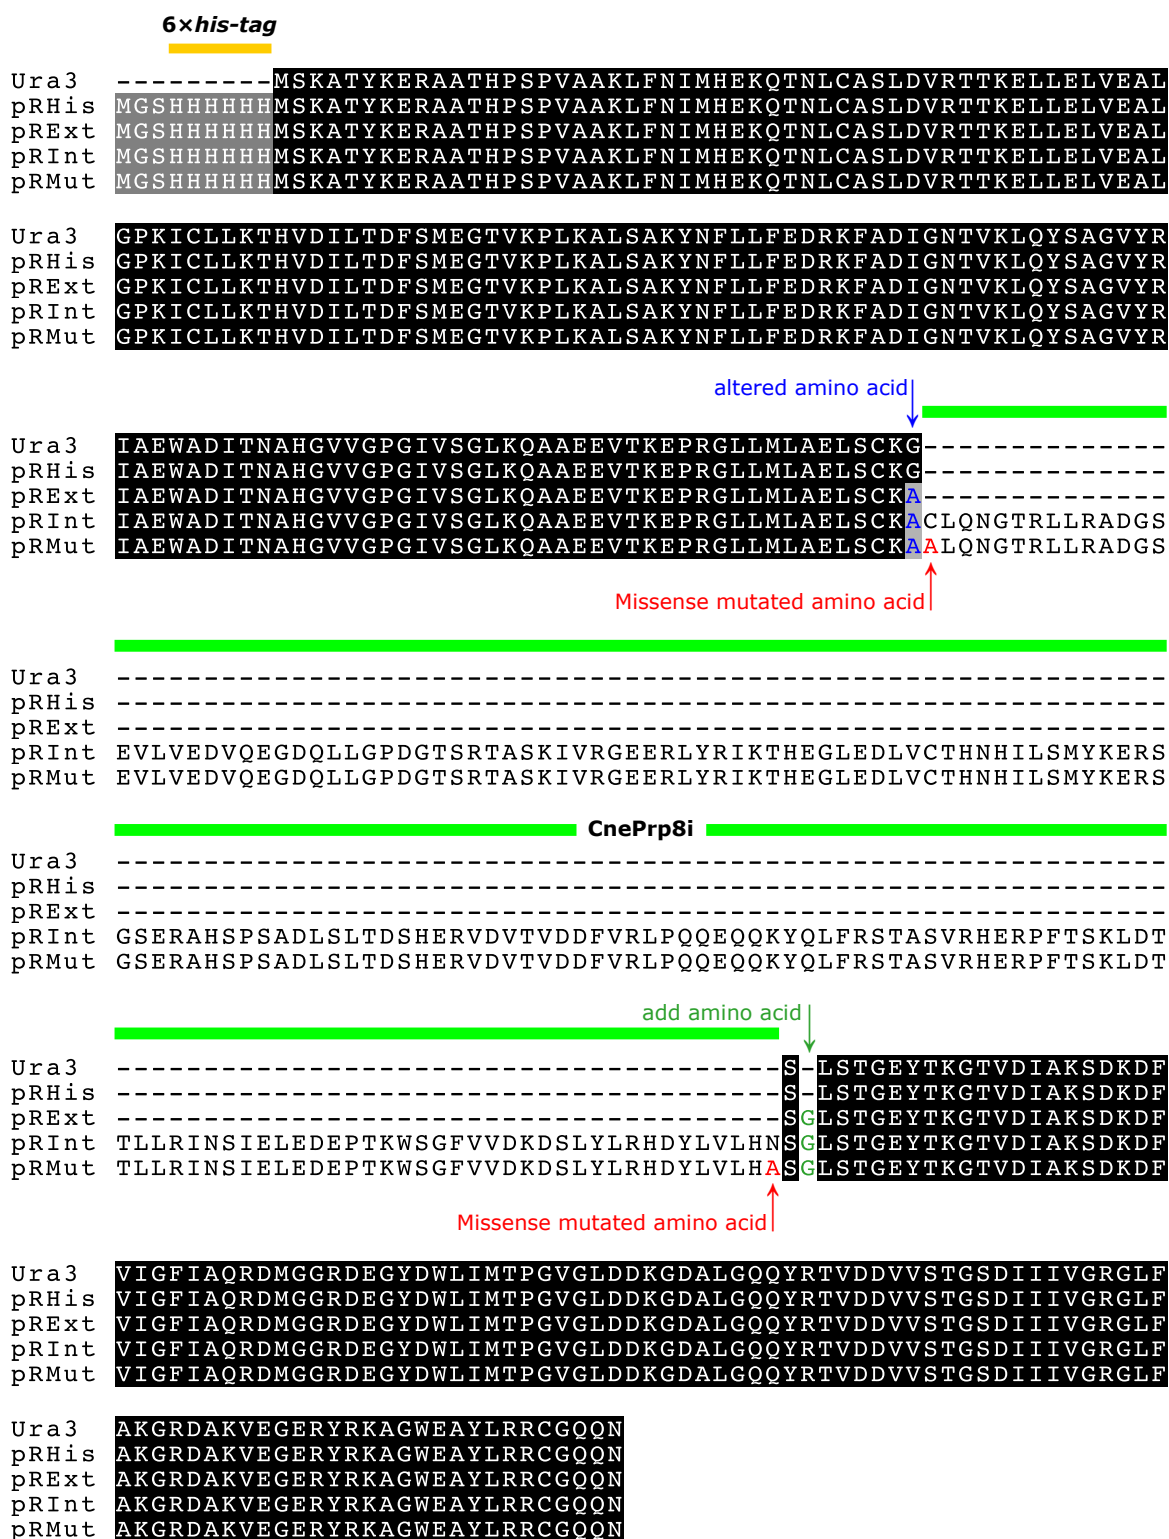

**Figure S8** – Protein sequences generated by this work, highlighting its modifications

>Ura3

MSKATYKERAATHPSPVAAKLFNIMHEKQTNLCASLDVRTTKELLELVEALGPKICLLKTHVDI  
LTDFSMEGTVKPLKALS AKYNFLLFEDRK FADIGNTVKLQYSAGVYRIA EWADITNAHGVVGP  
IVSGLKQAAEEVTKEPRG LLM LAELSCKGSLSTGEYTKGTVDIAKSDKDFVIGFIAQRDMGGRD  
EGYDWLIMTPGVGLDDKGDALGQQYRTVDDVVSTGSDIIIVGRGLFAKGRDAKVEGERYRKAGW  
EAYLRRCGQQN\*

>pRHis

MGS **HHHHHH**MSKATYKERAATHPSPVAAKLFNIMHEKQTNLCASLDVRTTKELLELVEALGPKI  
CLLKTHVDILTDFSMEGTVKPLKALS AKYNFLLFEDRK FADIGNTVKLQYSAGVYRIA EWADIT  
NAHGVVGP GIVSGLKQAAEEVTKEPRG LLM LAELSCKGSLSTGEYTKGTVDIAKSDKDFVIGFI  
AQRDMGGRDEGYDWLIMTPGVGLDDKGDALGQQYRTVDDVVSTGSDIIIVGRGLFAKGRDAKVE  
GERYRKAGWEAYLRRCGQQN\*

>pRExt

MGS **HHHHHH**MSKATYKERAATHPSPVAAKLFNIMHEKQTNLCASLDVRTTKELLELVEALGPKI  
CLLKTHVDILTDFSMEGTVKPLKALS AKYNFLLFEDRK FADIGNTVKLQYSAGVYRIA EWADIT  
NAHGVVGP GIVSGLKQAAEEVTKEPRG LLM LAELSCK **A** **Sc** LSTGEYTKGTVDIAKSDKDFVIGF  
IAQRDMGGRDEGYDWLIMTPGVGLDDKGDALGQQYRTVDDVVSTGSDIIIVGRGLFAKGRDAKV  
EGERYRKAGWEAYLRRCGQQN\*

>pRInt

MGS **HHHHHH**MSKATYKERAATHPSPVAAKLFNIMHEKQTNLCASLDVRTTKELLELVEALGPKI  
CLLKTHVDILTDFSMEGTVKPLKALS AKYNFLLFEDRK FADIGNTVKLQYSAGVYRIA EWADIT  
NAHGVVGP GIVSGLKQAAEEVTKEPRG LLM LAELSCK **A** **CLQNGTRLLRADGSEVLVEDVQEGDQ**  
**LLGPDGTSRTASKIVRGEERLYRIKTHEGLEDLVCTH NHILSMYKERSG SERAHSPSADLSLTD**  
**SHERVDVTVD D FVRLPQQEQQKYQLFRSTASVRHERPFTSKLDTTLLRINSIELEDEPTKWSGF**  
**VVDKDSL YLRHDYLV LHN** **Sc** LSTGEYTKGTVDIAKSDKDFVIGFIAQRDMGGRDEGYDWLIMTP  
GVGLDDKGDALGQQYRTVDDVVSTGSDIIIVGRGLFAKGRDAKVEGERYRKAGWEAYLRRCGQQ  
N\*

>pRMut

MGS **HHHHHH**MSKATYKERAATHPSPVAAKLFNIMHEKQTNLCASLDVRTTKELLELVEALGPKI  
CLLKTHVDILTDFSMEGTVKPLKALS AKYNFLLFEDRK FADIGNTVKLQYSAGVYRIA EWADIT  
NAHGVVGP GIVSGLKQAAEEVTKEPRG LLM LAELSCK **A** **CLQNGTRLLRADGSEVLVEDVQEGDQ**  
**LLGPDGTSRTASKIVRGEERLYRIKTHEGLEDLVCTH NHILSMYKERSG SERAHSPSADLSLTD**  
**SHERVDVTVD D FVRLPQQEQQKYQLFRSTASVRHERPFTSKLDTTLLRINSIELEDEPTKWSGF**  
**VVDKDSL YLRHDYLV LHN** **Sc** LSTGEYTKGTVDIAKSDKDFVIGFIAQRDMGGRDEGYDWLIMTP  
GVGLDDKGDALGQQYRTVDDVVSTGSDIIIVGRGLFAKGRDAKVEGERYRKAGWEAYLRRCGQQ  
N\*
